# Supplementary material for: Strike-slip faulting in extending upper plates: insight from the Aegean
Source: Copernicus journal article supplement (doi:10.5194/egusphere-2024-569), 2024-02-29
Supplement: Supplementary file 1 [file egusphere-2024-569-supplement.pdf]

**Supplementary material:**

**Table S1: Rheological parameters used for all 3D models presented in this study**

| <b>Property</b>                    | <b>Unit</b>                         | <b>UC</b>              | <b>LC</b>              | <b>LM</b>              |
|------------------------------------|-------------------------------------|------------------------|------------------------|------------------------|
| <i>Density</i>                     | kg/m <sup>3</sup>                   | 2800                   | 2800                   | 3300                   |
| <i>Thermal diffusivity</i>         | m <sup>2</sup> /s                   | 1.19×10 <sup>-6</sup>  | 1.19×10 <sup>-6</sup>  | 1.33×10 <sup>-6</sup>  |
| <i>Viscosity prefactor</i>         | Pa <sup>-n</sup> .s <sup>-1</sup>   | 8.57×10 <sup>-28</sup> | 8.57×10 <sup>-28</sup> | 6.52×10 <sup>-16</sup> |
| <i>Stress exponent</i>             | -                                   | 4.0                    | 4.0                    | 3.5                    |
| <i>Activation energy</i>           | J/mol                               | 223. ×10 <sup>3</sup>  | 223. ×10 <sup>3</sup>  | 530. ×10 <sup>3</sup>  |
| <i>Activation volume</i>           | m <sup>3</sup> /mol                 | 0                      | 0                      | 18.e-6                 |
| <i>Thermal expansivity</i>         | K <sup>-1</sup>                     | 2×10 <sup>-5</sup>     | 2×10 <sup>-5</sup>     | 2×10 <sup>-5</sup>     |
| <i>Specific heat</i>               | J.Kg <sup>-1</sup> .K <sup>-1</sup> | 750                    | 750                    | 750                    |
| <i>Heat production</i>             | W/m <sup>3</sup>                    | 1.5×10 <sup>-6</sup>   | 0                      | 0                      |
| <i>Angles of internal friction</i> | degree                              | 20                     | 20                     | 20                     |
| <i>Cohesion</i>                    | Pa                                  | 20. ×10 <sup>6</sup>   | 20. ×10 <sup>6</sup>   | 20. ×10 <sup>6</sup>   |

*Note. Cohesion and angles of internal friction decrease for 50% due to strain weakening process. UC: upper crust; LC: lower crust; LM: lithosphere mantle.*
